# Supplementary material
Source: PubMed Central journal article supplement (PMC6652765)
Supplement: IAI.00200-19-s0001.pdf [file IAI.00200-19-s0001.pdf]

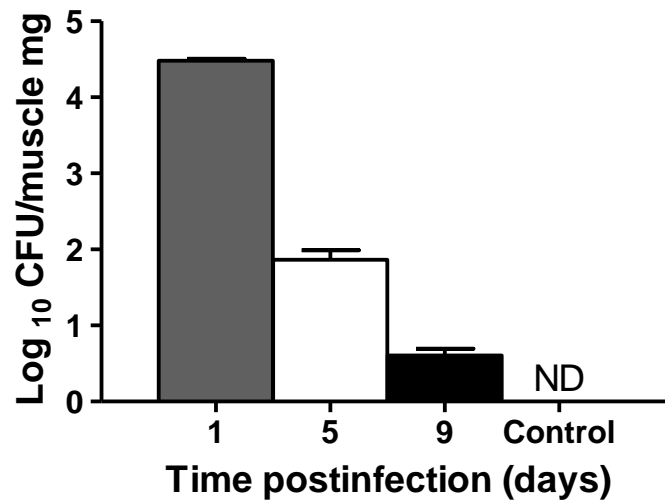

**Supplementary Figure S1. *C. perfringens* persists in muscle tissue after infection with a sublethal inoculum.** Groups of 4 mice CD-1 were injected intramuscularly with  $1 \times 10^6$  CFU of *C. perfringens* and the number of CFU was determined in the infected gastrocnemius 1, 5 and 9 days post infection. Control was injected with sterile PBS. ND: No detected.

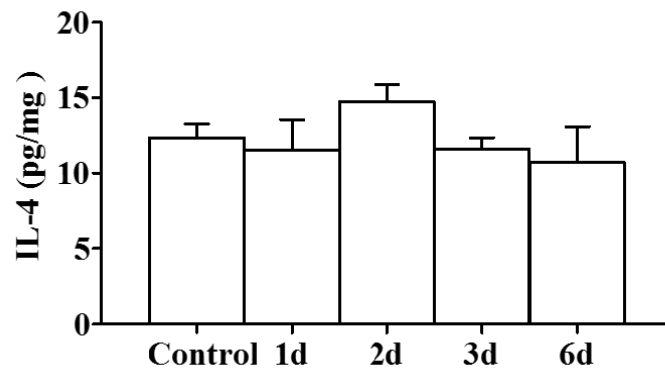

**Supplementary Figure S2. IL-4 expression in mouse gastrocnemius after an experimental infection with a sublethal inoculum of *C. perfringens*.** Groups of 4 CD-1 mice were injected intramuscularly with  $1 \times 10^6$  CFU of *C. perfringens* and the expression of IL-4 in the infected muscles was measured by ELISAs at different times. Controls were injected with sterile PBS. Results show the mean  $\pm$  SE. No statistically significant differences were obtained.

### IL-13

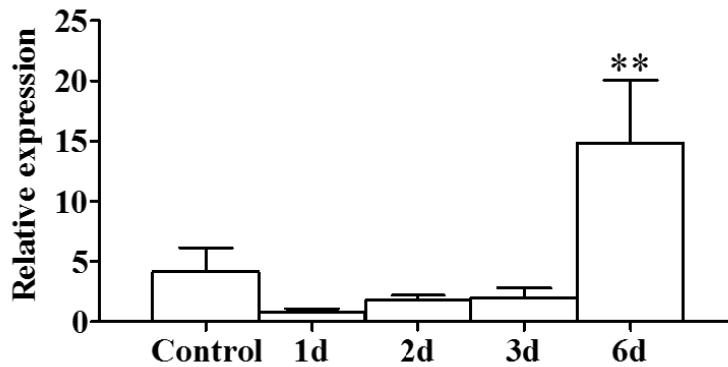

**Supplementary Figure S3. IL-13 expression in mouse gastrocnemius after an experimental infection with a sublethal inoculum of *C. perfringens*.** Groups of 4 CD-1 mice were injected intramuscularly with  $1 \times 10^6$  CFU of *C. perfringens* and the expression of IL-13 in the infected muscles was measured by RT-PCR at different times. The results obtained with three normalization genes (GADPH, RPL13A, RNSP1) were incorporated in, based on  $2^{-\Delta\Delta Ct}$  calculation. Controls were injected with sterile PBS. Results show the mean  $\pm$  SE. \*\* $p < 0.05$  for samples with a statistically significant difference when compared with controls.
